# Supplementary material for: The genetic status of the Hungarian brown trout populations: exploration of a blind spot on the European map of Salmo trutta studies
Source: PeerJ. 2018 Sep 21;6:e5152. doi: 10.7717/peerj.5152 (PMC6152457; doi:10.7717/peerj.5152)
Supplement: Table S4 [file peerj-06-5152-s004.xlsx]

## Sheet: Lillafüred-1
Population	Sample	CRmtDNA	SL		LDH		BFRO002		OMM1064		Ssa408uos		SsoSL417		SsoSL438		sdY marker
LF1	4	100	100	100	100	100	116	120	176	182	223	258	175	175	103	105	ND
LF1	5	100	100	200	200	200	116	116	208	261	219	227	175	175	ND	ND	ND
LF1	6	100	100	100	100	200	116	116	261	197	208	247	175	175	97	103	ND
LF1	8	100	100	100	200	200	116	120	176	228	233	258	175	175	103	105	ND
LF1	9	100	100	100	100	200	116	116	243	228	243	205	175	173	ND	ND	ND
LF1	13	100	100	100	200	200	116	116	208	261	239	247	175	181	103	105	ND
LF1	15	100	100	100	200	200	116	120	228	261	227	247	175	175	97	103	ND
LF1	17	100	100	200	100	200	116	116	182	227	227	247	175	177	103	105	ND
LF1	20	100	100	100	100	200	116	120	172	247	247	258	177	186	103	105	ND
LF1	21	100	100	100	100	100	116	120	197	228	247	227	175	175	ND	ND	ND
LF1	22	100	100	100	100	200	116	120	172	267	243	235	188	181	ND	ND	ND
LF1	27	100	100	100	200	200	116	120	197	228	219	227	175	177	103	105	ND
LF1	28	100	100	100	100	200	116	116	172	261	239	247	177	181	103	103	ND
LF1	29	100	100	100	200	200	116	116	208	261	219	239	175	190	105	105	ND
LF1	30	100	100	100	200	200	116	116	261	228	227	205	181	177	ND	ND	ND
LF1	31	100	100	100	100	200	116	116	197	208	239	247	175	190	103	105	ND
LF1	33	100	100	100	200	200	116	120	228	261	227	247	175	177	103	103	ND
LF1	35	100	100	100	100	200	116	116	208	261	219	239	175	190	103	105	ND
LF1	40	100	100	200	100	100	116	116	172	227	258	247	188	190	103	105	ND
LF1	41	100	100	100	200	200	113	116	172	222	235	223	ND	ND	ND	ND	ND
LF1	44	100	100	100	100	100	116	116	197	178	247	227	177	177	ND	ND	ND
LF1	46	100	100	200	100	200	116	116	214	228	ND	ND	173	181	105	108	ND
LF1	47	100	100	200	200	200	116	120	172	232	227	258	175	177	103	105	ND
LF1	48	100	100	100	100	200	116	116	172	261	219	239	177	190	103	105	ND
LF1	50	100	100	100	100	200	116	116	232	261	247	239	175	173	ND	ND	ND
LF1	51	100	100	100	100	200	116	116	172	172	219	258	175	175	103	105	ND
LF1	52	100	100	100	200	200	116	116	243	267	205	235	177	188	99	103	ND
LF1	53	100	100	200	100	100	113	116	267	243	ND	ND	175	171	ND	ND	ND
LF1	54	100	100	100	100	100	116	116	172	346	227	208	ND	ND	ND	ND	ND
LF1	55	100	100	100	100	100	116	120	215	232	205	255	175	175	103	105	ND
LF1	56	100	100	100	200	200	116	116	172	261	219	239	177	181	ND	ND	ND
LF1	57	100	100	200	100	200	116	120	172	197	258	262	175	181	97	103	ND
LF1	59	100	100	100	100	200	116	116	172	172	247	239	181	177	ND	ND	ND
LF1	60	100	100	200	100	200	116	116	182	197	250	227	ND	ND	103	105	ND
LF1	61	100	100	100	100	100	116	116	172	197	ND	ND	190	177	ND	ND	ND
LF1	63	100	100	100	100	100	113	120	182	232	258	219	181	175	ND	ND	ND
LF1	68	100	100	100	100	100	116	120	197	232	219	239	173	177	103	105	ND
LF1	72	100	100	100	100	100	116	120	182	197	215	219	179	181	105	105	ND
LF1	73	100	100	200	100	200	113	120	176	182	227	211	181	175	103	105	ND
LF1	75	100	100	100	100	100	120	116	261	228	247	235	ND	ND	ND	ND	ND
LF1	79	100	100	100	100	200	116	116	214	232	ND	ND	184	175	ND	ND	ND
LF1	80	100	100	200	100	100	116	116	197	228	219	239	173	177	105	105	ND
LF1	85	100	100	200	100	200	116	113	255	222	243	247	175	188	103	103	ND
LF1	86	100	100	100	100	200	116	116	172	197	215	258	173	175	99	103	ND
LF1	87	100	100	200	100	100	120	116	210	172	235	223	190	188	ND	ND	ND
LF1	90	100	100	100	100	100	116	120	168	172	223	258	175	184	103	105	ND
LF1	91	100	100	100	100	200	116	120	197	232	258	250	175	175	ND	ND	ND
LF1	94	100	100	100	100	100	116	116	197	208	239	247	177	181	103	105	ND
LF1	95	100	100	100	200	200	116	124	230	263	219	235	177	190	105	108	ND
LF1	96	100	100	100	100	100	116	120	214	232	227	208	181	175	ND	ND	ND
LF1	97	100	100	100	100	200	116	116	172	261	227	247	175	190	103	103	ND
LF1	98	100	100	100	100	200	116	116	261	228	239	247	177	190	103	105	ND
LF1	102	100	100	100	200	200	116	120	197	232	227	219	175	175	ND	ND	ND
LF1	103	100	100	100	100	100	116	116	228	261	219	239	173	177	105	105	ND
LF1	104	100	100	200	100	100	116	116	197	278	227	247	175	175	103	103	ND
LF1	105	100	100	200	100	200	116	116	172	172	223	243	181	188	103	105	ND
LF1	106	100	100	100	100	100	116	116	197	208	239	247	177	190	103	105	ND
LF1	113	100	100	200	100	200	116	116	172	197	227	247	177	177	103	105	ND
LF1	115	100	100	100	100	200	120	120	227	228	205	239	175	177	97	103	ND
LF1	116	100	100	100	100	100	116	120	228	261	227	247	175	175	103	103	ND
LF1	117	100	100	100	100	200	116	120	197	228	247	227	175	175	ND	ND	ND
LF1	118	100	100	100	200	200	120	116	227	172	258	247	190	190	ND	ND	ND
LF1	119	100	100	200	100	200	116	116	172	208	223	247	188	190	97	105	ND
LF1	120	100	100	100	100	100	120	116	164	164	235	205	175	173	ND	ND	ND
LF1	121	100	100	100	100	200	116	120	176	176	239	219	179	173	97	105	ND
LF1	122	100	100	200	100	200	116	116	172	230	219	223	181	188	97	105	ND
LF1	123	100	100	200	100	200	116	120	182	227	215	233	175	188	105	105	ND
LF1	124	100	100	100	200	200	120	120	172	230	205	233	173	188	97	99	ND
LF1	125	100	100	200	100	100	116	116	243	267	219	223	175	188	97	105	ND
LF1	127	100	100	200	100	200	116	120	214	232	235	235	175	179	101	105	ND
LF1	128	100	100	100	100	200	116	116	208	267	235	205	175	173	ND	ND	ND
LF1	131	100	100	200	100	100	120	116	168	168	235	223	ND	ND	ND	ND	ND
LF1	132	100	100	100	100	200	116	120	178	261	247	227	175	175	ND	ND	ND
LF1	133	100	100	100	200	200	116	116	208	261	227	247	175	181	103	103	ND
LF1	139	100	100	200	100	200	113	116	176	267	235	219	177	173	105	105	ND
LF1	140	100	100	100	100	200	116	116	172	227	205	233	177	190	97	103	ND
LF1	141	100	100	100	100	200	116	116	197	227	243	258	173	177	103	105	ND
LF1	144	100	100	100	100	200	116	116	197	261	208	247	175	175	97	103	ND
LF1	145	100	100	100	100	200	116	120	253	232	227	205	181	175	ND	ND	ND
LF1	146	100	100	100	100	200	116	120	176	232	233	227	186	175	ND	ND	ND
LF1	147	100	100	100	100	200	116	116	232	267	247	235	184	175	97	105	ND
LF1	148	100	100	100	100	100	116	116	197	261	219	208	177	177	ND	ND	ND
LF1	151	100	100	200	100	200	116	116	176	179	205	223	184	190	103	105	ND
LF1	155	100	100	100	100	200	116	120	179	255	205	243	175	188	103	103	ND
LF1	156	200	100	100	100	100	116	116	172	240	ND	ND	190	173	ND	ND	1
LF1	157	100	100	200	100	100	116	116	261	232	258	205	175	175	101	103	ND
LF1	159	100	100	100	100	100	116	120	232	261	247	235	177	173	101	108	ND
LF1	160	100	100	100	100	200	116	120	172	222	227	262	175	175	103	105	ND
LF1	165	100	100	100	100	100	116	120	197	228	239	247	173	177	103	105	ND
LF1	170	100	100	100	100	100	120	120	208	243	215	239	175	188	97	105	ND
LF1	171	100	100	200	100	200	116	120	182	208	239	223	177	177	ND	ND	ND
LF1	172	100	100	200	100	200	116	120	232	267	205	223	175	188	103	105	ND
LF1	173	100	100	100	200	200	116	120	208	247	205	239	173	188	103	103	ND
LF1	174	100	100	100	100	200	116	116	172	222	223	243	181	188	99	105	ND
LF1	175	100	100	100	100	100	116	116	228	247	219	239	177	179	97	99	ND
LF1	176	100	100	100	100	100	116	120	176	182	205	239	173	175	103	103	ND
LF1	177	100	100	100	100	100	116	116	232	247	227	239	188	188	97	105	ND
LF1	178	100	100	200	100	100	116	120	219	267	219	223	179	188	103	105	ND
LF1	179	100	100	200	100	100	116	120	172	247	215	247	188	188	97	105	ND
LF1	180	100	100	200	100	100	116	116	232	267	235	247	177	177	99	103	ND
LF1	181	100	100	200	100	100	116	120	228	267	243	243	179	188	103	105	ND
LF1	182	100	100	100	100	200	116	116	176	243	205	239	173	181	103	103	ND
LF1	183	100	100	200	100	200	116	116	172	208	223	239	177	179	103	105	ND
LF1	184	100	100	100	100	100	116	116	222	228	223	235	177	179	99	105	ND
LF1	185	100	100	100	100	100	116	120	172	227	215	235	188	188	99	105	ND
LF1	186	100	100	200	200	200	116	120	172	261	239	223	188	175	108	110	ND
LF1	187	100	100	100	100	200	116	120	185	208	205	239	173	175	97	97	ND
LF1	188	100	100	100	100	200	116	116	172	267	223	250	188	188	99	99	ND
LF1	189	100	100	100	100	100	116	120	164	232	205	243	175	184	103	105	ND
LF1	190	100	100	200	100	200	120	120	182	182	ND	ND	188	188	ND	ND	ND
LF1	191	100	100	200	100	200	116	120	228	232	223	239	175	179	105	105	ND
LF1	192	100	100	200	100	200	116	116	172	176	215	247	175	177	99	103	ND
LF1	193	100	100	100	100	100	116	116	208	228	239	219	179	173	97	105	ND
LF1	194	100	100	100	100	200	116	120	243	243	239	247	173	181	103	105	ND
LF1	195	100	100	100	100	200	116	120	243	243	239	247	173	181	103	105	ND
LF1	196	100	100	100	100	200	116	116	208	232	205	223	173	188	103	105	ND
LF1	197	100	100	100	100	100	116	116	208	243	227	243	173	173	103	106	ND
LF1	198	100	100	100	100	100	116	116	228	232	235	205	179	177	ND	ND	ND
LF1	199	100	100	100	100	200	116	116	208	247	239	239	177	177	97	105	ND
LF1	200	100	100	100	100	200	116	116	208	243	227	243	188	190	103	106	ND
LF1	201	100	100	200	100	200	116	120	187	251	ND	ND	ND	ND	103	106	ND
LF1	202	100	100	200	100	200	120	116	267	245	ND	ND	177	188	ND	ND	ND
LF1	203	100	100	100	100	100	116	116	185	243	247	239	173	173	ND	ND	ND
LF1	204	100	100	100	100	200	116	116	208	232	243	205	188	188	ND	ND	ND
LF1	205	100	100	200	100	200	116	120	228	243	239	219	179	173	97	103	ND
LF1	206	100	100	200	100	200	116	116	245	228	ND	ND	173	177	ND	ND	ND
LF1	207	100	100	100	100	100	116	120	182	243	239	205	173	173	ND	ND	ND
LF1	208	100	100	100	100	100	116	116	172	185	219	227	173	179	97	97	ND
LF1	209	100	100	100	200	200	116	120	176	247	227	239	175	190	97	105	ND
LF1	210	100	200	200	100	200	116	116	172	208	219	239	177	181	97	105	ND
LF1	211	100	100	200	100	200	116	116	172	176	219	247	173	179	97	106	ND
LF1	212	100	100	200	100	100	120	120	172	232	215	243	179	188	97	99	ND
LF1	213	100	100	200	100	200	116	116	172	176	247	235	179	175	ND	ND	ND
LF1	214	100	200	200	100	200	116	120	176	247	205	227	173	190	97	105	ND
LF1	215	100	100	100	200	200	116	116	172	230	215	250	177	188	99	103	ND
LF1	216	100	100	100	200	200	116	116	176	222	250	239	179	175	ND	ND	ND
LF1	217	100	100	200	200	200	116	116	172	176	239	215	190	179	99	105	ND
LF1	218	100	100	100	100	100	116	116	172	232	243	247	173	179	103	103	ND
LF1	219	100	100	100	100	100	116	120	267	267	223	235	188	188	103	105	ND
LF1	220	100	100	100	100	200	116	116	228	247	235	239	179	181	99	99	ND
LF1	221	100	100	100	200	200	116	120	232	261	239	247	173	177	103	105	ND
LF1	222	100	100	200	100	200	113	116	197	243	219	205	188	177	103	105	ND
LF1	223	100	200	200	100	100	116	116	208	232	239	215	179	173	ND	ND	ND
LF1	224	100	100	200	100	200	113	116	176	243	235	239	173	177	105	105	ND
LF1	225	100	100	200	100	200	116	120	176	228	247	219	188	173	97	106	ND
LF1	226	100	100	200	100	200	116	120	182	253	247	215	188	171	ND	ND	ND
LF1	227	100	100	200	200	200	116	116	178	208	247	258	175	175	97	103	ND
LF1	228	100	100	100	100	200	116	120	172	228	223	219	188	181	ND	ND	ND
LF1	229	100	100	200	100	100	116	116	197	208	255	258	173	190	97	105	ND
LF1	230	100	100	100	100	100	116	120	197	232	239	211	188	181	ND	ND	ND
LF1	231	100	100	100	100	200	116	116	222	243	262	235	177	173	ND	ND	ND
LF1	232	100	100	100	100	100	116	120	228	261	227	219	175	175	ND	ND	ND
LF1	233	100	100	100	100	100	116	120	197	208	239	247	175	177	97	103	ND
LF1	234	100	100	100	100	100	116	116	176	197	219	262	173	177	97	105	ND
LF1	235	100	100	100	200	200	120	120	232	261	258	227	ND	ND	103	103	ND
LF1	236	100	100	200	100	200	116	116	182	197	227	215	173	173	ND	ND	ND
LF1	237	100	100	200	100	200	116	116	172	197	215	258	173	175	99	103	ND
LF1	238	100	100	100	100	200	116	116	178	261	227	219	177	177	97	105	ND
LF1	239	100	100	100	100	200	116	120	172	243	219	235	175	188	97	99	ND
LF1	240	100	100	100	100	200	116	120	176	208	235	247	175	184	97	105	ND
LF1	241	100	100	200	100	100	116	116	172	243	219	235	188	188	99	103	ND
LF1	242	100	100	100	100	100	116	116	267	346	219	235	177	184	105	105	ND
LF1	243	100	100	200	100	200	116	116	172	243	215	258	173	188	103	105	ND
LF1	244	100	100	200	100	100	116	120	228	267	235	219	190	181	97	99	ND
LF1	245	100	100	200	100	100	116	116	ND	ND	258	227	190	177	ND	ND	ND
LF1	246	100	100	200	100	200	116	120	208	267	255	255	181	171	ND	ND	ND
LF1	247	100	100	200	100	100	116	116	172	172	262	255	175	175	ND	ND	ND
LF1	248	100	100	100	200	200	116	124	267	288	235	247	173	188	99	103	ND
LF1	249	100	100	100	100	100	116	116	197	208	219	250	175	175	97	105	ND
LF1	250	100	100	200	100	200	116	120	172	208	227	258	175	175	103	103	ND
LF1	251	100	100	200	100	200	116	116	182	197	258	250	175	173	103	105	ND
LF1	252	100	100	100	100	100	116	116	168	172	227	227	184	177	103	103	ND
LF1	253	100	100	200	100	200	116	124	172	222	247	247	188	177	ND	ND	ND
LF1	254	100	100	200	100	200	116	116	230	267	235	235	177	188	99	105	ND
LF1	255	100	100	100	100	100	116	120	172	172	211	219	184	173	105	105	ND
LF1	256	100	100	100	100	200	116	116	214	253	211	223	175	181	97	103	ND
LF1	257	100	100	100	100	200	113	116	232	267	219	247	173	175	97	105	ND
LF1	258	100	100	100	100	100	113	120	222	232	205	215	173	179	103	105	ND
LF1	259	100	100	100	200	200	116	120	228	261	219	239	175	190	105	105	ND
LF1	260	100	100	200	100	200	116	116	197	228	235	247	177	190	103	108	ND
LF1	261	100	100	200	200	200	116	120	172	228	205	227	177	177	ND	ND	ND
LF1	262	100	100	200	100	200	116	120	172	228	205	250	175	177	103	105	ND
LF1	263	100	100	100	100	200	116	120	232	267	235	247	173	175	97	105	ND
LF1	264	100	100	100	100	100	116	116	247	247	235	235	181	177	97	105	ND
LF1	265	100	100	100	100	100	116	120	197	228	219	227	177	177	103	105	ND
LF1	266	100	100	100	100	100	116	116	176	178	250	235	190	181	97	105	ND
LF1	267	100	100	100	100	100	116	116	172	197	211	219	173	181	105	105	ND
LF1	268	100	100	200	100	100	120	120	172	227	227	247	177	177	103	106	ND
LF1	269	100	100	200	100	100	116	120	172	208	258	258	175	190	103	103	ND
LF1	270	100	100	100	100	100	116	116	267	288	215	235	173	181	105	105	ND
LF1	271	100	100	200	100	100	116	116	232	247	223	227	175	175	103	105	ND
LF1	272	100	100	100	200	200	116	116	208	267	223	235	188	190	105	108	ND
LF1	273	100	100	100	200	200	116	116	243	267	205	235	177	188	97	99	ND
LF1	274	100	100	200	200	200	113	120	208	261	247	258	173	173	97	103	ND
LF1	275	100	100	100	100	100	116	120	172	172	219	235	181	188	97	99	ND
LF1	276	100	100	200	200	200	116	116	197	232	239	247	177	190	103	105	ND
LF1	277	100	100	200	200	200	116	120	232	243	205	258	175	175	103	103	ND
LF1	278	100	100	200	100	200	116	116	172	179	205	235	188	188	99	103	ND
LF1	279	100	100	200	100	200	116	116	208	267	235	247	181	188	97	99	ND
LF1	280	100	100	100	100	200	110	113	164	176	219	239	173	177	97	105	ND
LF1	281	100	100	200	100	100	116	120	158	172	219	235	179	188	97	99	ND
LF1	282	100	100	200	200	200	120	120	178	208	205	258	175	177	103	103	ND
LF1	283	100	100	100	100	200	116	116	208	261	239	247	173	175	103	105	ND
LF1	284	100	100	100	100	100	116	120	232	261	219	227	175	177	103	105	ND
LF1	285	100	100	200	100	200	116	116	182	227	227	247	175	190	103	105	ND
LF1	286	100	100	100	100	200	116	120	168	182	205	247	173	181	97	103	ND
LF1	287	100	100	100	100	200	116	116	172	172	219	235	181	188	97	99	ND
LF1	289	100	100	200	100	200	116	116	197	208	219	250	177	177	97	105	ND
LF1	290	100	100	100	200	200	116	116	172	197	219	239	175	181	105	105	ND
LF1	291	100	100	200	100	200	116	116	176	185	227	239	173	173	97	103	ND
LF1	292	100	100	100	100	100	116	120	208	267	223	247	181	188	97	105	ND
LF1	293	100	100	200	100	200	116	120	179	232	235	247	175	181	99	103	ND
LF1	295	100	100	100	100	200	116	120	228	261	227	247	175	177	103	103	ND
LF1	296	100	100	100	100	200	116	116	197	227	243	258	173	177	105	105	ND
LF1	297	100	100	100	100	200	110	110	164	216	227	233	175	186	103	105	ND
LF1	298	100	100	200	100	200	113	116	197	243	219	250	177	190	105	105	ND
LF1	300	100	100	200	100	100	116	116	232	261	219	239	173	175	105	105	ND
LF1	301	100	100	200	100	200	116	116	160	172	223	243	179	188	103	105	ND
LF1	302	100	100	100	100	200	116	116	172	179	205	235	177	188	99	103	ND
LF1	303	100	100	200	100	100	120	120	232	232	215	250	173	188	ND	ND	ND
LF1	304	100	100	200	100	100	116	120	228	232	235	205	190	175	103	108	ND
LF1	305	100	100	100	100	200	113	116	267	210	247	235	184	175	ND	ND	ND
LF1	306	100	100	200	100	200	113	116	243	197	ND	ND	175	175	ND	ND	ND
LF1	307	100	100	200	100	200	116	116	267	227	243	227	184	173	ND	ND	ND
LF1	308	100	100	100	100	100	116	116	176	232	219	235	179	184	105	105	ND
LF1	309	100	100	200	100	100	116	120	216	172	258	215	181	175	ND	ND	ND
LF1	310	100	100	200	100	200	116	116	172	232	255	239	190	173	ND	ND	ND
LF1	311	100	100	100	100	100	120	116	182	208	262	258	175	175	ND	ND	ND
LF1	312	100	100	200	100	200	120	120	178	185	258	258	175	177	103	103	ND
LF1	313	100	100	100	100	200	120	116	172	267	223	219	177	175	ND	ND	ND
LF1	314	100	100	100	100	100	116	116	261	208	239	215	175	173	105	105	ND
LF1	315	100	100	200	100	200	120	116	172	179	239	205	181	181	103	105	ND
LF1	316	100	100	100	100	100	120	116	172	234	227	255	181	190	99	101	ND
LF1	317	100	100	100	200	200	120	116	ND	ND	ND	ND	188	173	97	103	ND
LF1	318	100	100	100	100	200	120	116	267	232	219	205	ND	ND	103	105	ND
LF1	319	100	100	100	100	200	116	113	182	232	239	205	181	177	ND	ND	ND
LF1	320	100	100	100	100	100	116	124	288	172	239	247	190	190	105	105	ND
LF1	321	100	100	100	100	100	116	116	176	208	ND	ND	184	175	ND	ND	ND
LF1	322	100	100	200	100	200	120	120	232	261	258	247	177	175	97	103	ND
LF1	323	100	100	200	100	100	116	120	232	227	233	205	188	175	ND	ND	ND
LF1	324	100	100	100	100	100	116	124	172	288	247	247	190	190	ND	ND	ND
LF1	325	100	100	100	100	100	116	124	172	172	247	205	190	190	ND	ND	ND
LF1	326	100	100	100	100	100	116	116	222	243	227	205	188	177	ND	ND	ND
LF1	327	100	100	100	100	100	116	120	232	232	250	227	177	173	ND	ND	ND
LF1	328	100	100	200	100	200	116	120	281	172	243	239	190	181	ND	ND	ND
LF1	329	100	100	100	100	100	116	116	232	185	ND	ND	190	175	ND	ND	ND
LF1	330	100	100	200	100	100	113	120	208	232	235	205	175	175	ND	ND	ND
LF1	331	100	100	100	200	200	116	116	232	197	239	219	177	173	ND	ND	ND
LF1	332	100	100	100	100	200	120	116	208	197	258	255	177	173	ND	ND	ND
LF1	333	100	100	200	100	100	120	120	ND	ND	239	205	ND	ND	ND	ND	ND
LF1	334	100	200	200	100	100	116	116	253	255	239	239	175	181	97	97	ND
LF1	335	100	100	100	100	100	124	116	172	288	247	247	175	173	ND	ND	ND
LF1	336	100	100	100	100	100	116	116	197	232	235	219	173	173	ND	ND	ND
LF1	337	100	100	100	100	200	120	116	197	208	ND	ND	190	177	ND	ND	ND
LF1	338	100	100	200	100	100	113	116	214	232	235	239	175	179	97	101	ND
LF1	339	100	100	100	100	200	113	116	208	267	ND	ND	ND	ND	ND	ND	ND
LF1	340	100	200	200	100	200	116	116	232	172	239	215	190	181	ND	ND	ND
LF1	341	100	100	100	100	200	113	116	197	243	219	239	177	179	97	105	ND
LF1	342	100	100	100	200	200	116	120	261	232	227	219	175	175	ND	ND	ND
LF1	343	100	100	200	100	200	116	120	172	243	223	219	ND	ND	ND	ND	ND
LF1	344	100	100	100	100	200	116	120	232	197	247	235	177	173	ND	ND	ND
LF1	345	100	100	200	100	100	116	116	208	232	239	235	188	173	ND	ND	ND
LF1	346	100	100	200	100	200	116	120	172	232	205	247	177	177	ND	ND	ND
LF1	347	100	100	200	200	200	116	116	243	267	227	235	173	188	ND	ND	ND
LF1	348	100	100	100	100	200	113	116	178	208	205	258	175	175	103	103	ND
LF1	349	100	100	200	100	100	120	116	168	232	223	205	181	175	ND	ND	ND
LF1	350	100	100	100	100	100	124	116	288	232	ND	ND	190	181	ND	ND	ND
LF1	351	100	100	200	100	200	116	116	182	172	239	215	188	188	ND	ND	ND
LF1	352	100	100	200	100	200	116	120	228	267	ND	ND	ND	ND	ND	ND	ND
LF1	353	100	100	100	100	200	116	116	258	172	233	219	ND	ND	ND	ND	ND
LF1	354	100	100	200	100	200	120	120	228	243	258	247	177	175	ND	ND	ND
LF1	355	100	100	200	100	200	116	120	182	243	250	227	175	173	ND	ND	ND
LF1	356	100	100	100	100	100	116	116	172	172	227	219	181	177	ND	ND	ND
LF1	357	100	100	100	100	200	116	120	232	232	247	205	181	181	ND	ND	ND
LF1	358	100	100	100	100	100	116	116	176	179	223	205	181	181	101	101	ND
LF1	359	100	100	100	100	100	116	120	228	261	247	239	177	173	ND	ND	ND
LF1	360	100	100	100	100	100	116	116	197	208	250	247	177	175	ND	ND	ND
LF1	361	100	100	100	200	200	120	120	228	232	ND	ND	177	175	93	101	ND
LF1	362	100	100	200	200	200	120	116	197	232	247	239	190	177	ND	ND	ND
LF1	363	100	100	100	100	100	113	116	208	232	247	239	173	173	101	101	ND
LF1	364	100	100	200	100	100	124	116	172	255	ND	ND	ND	ND	ND	ND	ND
LF1	365	100	100	200	100	200	116	116	227	261	250	247	177	177	ND	ND	ND
LF1	366	100	100	200	100	100	116	120	172	267	243	223	188	179	ND	ND	ND
LF1	367	100	100	100	100	100	120	116	232	267	235	205	ND	ND	101	101	ND
LF1	368	100	100	200	100	100	120	120	261	232	258	247	175	175	ND	ND	ND
LF1	369	100	100	100	100	100	116	120	168	232	239	205	184	173	ND	ND	ND
LF1	299	100	100	100	100	100	116	116	172	197	227	233	169	175	103	105	ND
LF1	370	100	100	100	100	200	120	120	232	228	247	205	181	175	ND	ND	ND
LF1	371	100	100	100	100	200	116	116	243	267	223	205	188	188	ND	ND	ND
LF1	372	100	100	200	100	100	116	116	208	232	239	250	175	184	99	105	ND
LF1	373	100	100	100	100	200	116	116	168	232	205	239	181	188	103	105	ND
LF1	374	100	100	200	100	200	116	116	228	267	223	243	179	188	103	105	ND
LF1	375	100	100	200	100	100	116	120	172	232	233	215	188	181	ND	ND	ND
LF1	376	100	100	100	100	100	116	120	228	261	219	227	175	175	103	105	ND
LF1	377	100	100	100	100	100	113	116	208	267	219	247	173	175	97	105	ND
LF1	378	100	100	100	100	200	116	120	176	267	219	239	173	179	97	105	ND
LF1	379	100	100	200	100	200	116	120	197	232	235	247	177	190	103	105	ND
LF1	380	100	100	100	100	200	116	120	227	261	250	247	177	175	97	103	ND
LF1	7	100	100	100	100	100	116	116	267	172	243	223	188	181	ND	ND	ND
LF1	14	100	100	100	100	200	116	116	267	176	255	233	175	175	ND	ND	ND
LF1	39	100	100	100	100	200	120	116	228	197	227	219	175	175	ND	ND	ND
LF1	43	100	100	100	100	200	116	116	261	197	247	227	175	175	ND	ND	ND
LF1	65	100	100	100	100	200	120	116	228	214	227	208	184	175	ND	ND	ND
LF1	70	100	100	200	100	200	120	116	227	172	239	205	177	175	ND	ND	ND
LF1	74	100	100	100	100	100	116	116	261	197	247	227	175	175	ND	ND	ND
LF1	77	100	100	200	100	100	120	116	ND	ND	239	205	177	175	ND	ND	ND
LF1	82	100	100	100	100	200	116	116	176	172	233	233	190	175	ND	ND	ND
LF1	92	100	100	200	100	200	116	116	261	228	247	239	190	177	ND	ND	ND
LF1	100	100	100	100	200	200	116	116	232	197	247	235	177	173	ND	ND	ND
LF1	108	100	100	100	100	200	120	116	267	247	255	233	184	175	ND	ND	ND
LF1	109	100	100	200	100	100	120	116	232	176	235	205	184	175	ND	ND	ND
LF1	110	100	100	200	100	100	116	113	267	232	235	205	184	175	ND	ND	ND
LF1	112	100	100	200	100	100	116	116	232	232	233	227	190	175	ND	ND	ND
LF1	114	100	100	200	100	200	120	116	232	172	227	219	179	179	ND	ND	ND
LF1	129	100	100	100	100	200	116	113	267	210	247	219	175	173	ND	ND	ND
LF1	135	100	100	100	100	100	116	116	261	261	219	208	177	175	ND	ND	ND
LF1	137	100	100	100	200	200	116	116	261	228	247	235	190	175	ND	ND	ND
LF1	142	100	100	100	100	200	120	116	239	227	239	227	177	175	ND	ND	ND
LF1	149	100	100	100	100	100	124	116	255	172	243	239	190	177	ND	ND	ND
LF1	150	100	100	100	100	200	116	116	261	197	227	219	177	175	ND	ND	ND
LF1	154	100	100	100	100	100	116	116	267	197	250	219	175	173	ND	ND	ND
LF1	162	100	100	200	100	200	116	116	227	197	250	219	177	175	ND	ND	ND
LF1	163	100	100	100	100	200	120	116	179	172	ND	ND	190	181	ND	ND	ND
LF1	166	100	100	100	100	100	ND	ND	267	232	235	205	175	173	ND	ND	ND
LF1	167	100	100	200	100	200	116	113	176	176	239	235	179	173	ND	ND	ND
LF1	288	100	100	200	100	200	116	116	228	172	ND	ND	ND	ND	ND	ND	ND
LF1	294	100	100	200	100	100	116	116	179	172	235	219	188	177	ND	ND	ND
LF1	381	100	100	100	100	200	116	113	267	232	247	235	184	175	ND	ND	ND
LF1	382	100	100	200	100	200	116	116	227	172	258	258	190	175	ND	ND	ND
LF1	383	100	100	100	100	100	124	116	288	172	247	247	190	190	ND	ND	ND
LF1	384	100	100	200	100	200	116	116	227	172	239	205	190	181	ND	ND	ND
LF1	385	100	100	200	100	100	120	116	261	232	258	205	175	175	ND	ND	ND
LF1	386	100	100	100	100	100	ND	ND	210	176	247	219	184	175	ND	ND	ND
LF1	387	100	100	200	100	100	120	116	232	197	247	227	175	175	ND	ND	ND
LF1	388	100	100	200	100	100	116	116	208	197	239	219	190	177	ND	ND	ND
LF1	389	100	100	100	100	200	120	116	267	232	247	235	184	175	ND	ND	ND
LF1	390	100	100	200	100	200	116	116	197	172	227	215	175	173	ND	ND	ND
LF1	391	100	100	200	100	200	116	116	210	172	247	235	188	175	ND	ND	ND
LF1	392	100	100	200	100	200	116	113	267	232	219	205	175	173	ND	ND	ND
LF1	393	100	100	200	100	200	116	116	320	253	247	205	190	177	ND	ND	ND
LF1	394	100	200	200	100	200	120	116	182	172	239	233	190	188	ND	ND	ND
LF1	395	100	100	100	100	100	120	116	ND	ND	227	219	175	175	ND	ND	ND
LF1	396	100	100	100	100	100	120	116	267	210	235	205	184	175	ND	ND	ND
LF1	397	100	100	200	100	200	116	116	197	182	258	215	175	173	ND	ND	ND
LF1	398	100	100	200	100	100	116	113	ND	ND	235	219	177	173	ND	ND	ND
LF1	399	100	100	200	100	100	116	116	208	197	258	243	177	173	ND	ND	ND
LF1	400	100	100	200	200	200	116	116	261	232	239	219	175	173	ND	ND	ND
LF1	401	100	100	100	100	100	120	116	232	215	239	205	175	175	ND	ND	ND
LF1	402	100	100	200	100	200	116	116	261	232	239	219	190	177	ND	ND	ND
LF1	403	100	100	200	100	100	120	116	ND	ND	239	215	190	181	ND	ND	ND
LF1	404	100	100	100	100	100	116	113	267	176	235	235	184	179	ND	ND	ND
LF1	405	100	100	200	100	200	120	116	228	197	247	239	190	190	ND	ND	ND
LF1	406	100	100	200	100	200	116	113	210	176	235	205	175	173	ND	ND	ND
LF1	407	100	100	200	100	200	120	116	232	172	255	205	175	173	ND	ND	ND
LF1	408	100	100	200	100	100	120	116	232	210	247	205	181	181	ND	ND	ND
LF1	409	100	100	200	100	200	120	116	178	172	227	215	188	177	ND	ND	ND
LF1	410	100	100	200	100	200	120	116	210	176	219	205	175	173	ND	ND	ND
LF1	411	100	100	200	100	200	116	113	261	232	258	205	177	175	ND	ND	ND
LF1	412	100	100	200	100	200	116	116	ND	ND	235	219	188	179	ND	ND	ND
LF1	413	100	100	200	200	200	116	113	255	227	243	243	188	177	ND	ND	ND
LF1	414	100	100	100	100	100	120	116	288	228	258	239	190	175	ND	ND	ND
LF1	415	100	100	100	100	100	116	116	176	172	235	208	184	175	ND	ND	ND
LF1	416	100	100	200	200	200	116	116	261	210	247	235	177	175	ND	ND	ND
LF1	417	100	100	100	100	100	116	116	261	197	247	227	177	177	ND	ND	ND
LF1	418	100	100	200	100	100	116	113	267	232	250	223	188	173	ND	ND	ND
LF1	419	100	100	200	200	200	120	116	243	176	250	215	188	177	ND	ND	ND
LF1	420	100	100	200	100	200	116	116	227	197	255	247	177	173	ND	ND	ND
LF1	421	100	100	100	100	100	124	116	288	232	239	205	190	181	ND	ND	ND
LF1	422	100	100	100	100	100	116	116	261	197	227	219	175	175	ND	ND	ND
LF1	423	100	100	100	100	100	116	113	267	210	247	219	184	175	ND	ND	ND
LF1	424	100	100	100	100	100	116	116	247	232	258	233	186	175	ND	ND	ND
LF1	425	100	100	200	100	100	120	116	215	210	235	205	175	175	ND	ND	ND
LF1	426	100	100	100	100	100	120	116	210	176	235	205	184	175	ND	ND	ND
LF1	427	100	100	200	100	200	116	116	267	172	239	235	190	188	ND	ND	ND
LF1	428	100	100	100	100	200	116	116	261	261	247	208	177	175	ND	ND	ND
LF1	429	100	100	100	200	200	116	116	232	197	239	219	190	177	ND	ND	ND
LF1	430	100	200	200	200	200	120	116	261	176	258	239	179	175	ND	ND	ND
LF1	431	100	100	100	100	200	120	116	ND	ND	ND	ND	177	175	ND	ND	ND
LF1	432	100	100	100	100	200	116	116	ND	ND	247	215	190	188	ND	ND	ND
LF1	433	100	100	100	100	200	116	116	197	197	243	215	173	173	ND	ND	ND
LF1	434	100	100	200	100	200	116	113	232	215	247	239	184	175	ND	ND	ND
LF1	435	100	100	100	100	200	116	116	247	172	247	239	190	181	ND	ND	ND
LF1	436	100	100	200	200	200	120	116	243	172	223	205	188	188	ND	ND	ND
LF1	437	100	100	100	100	100	120	116	210	176	247	235	175	173	ND	ND	ND
LF1	438	100	100	200	200	200	120	116	247	172	ND	ND	186	177	ND	ND	ND
LF1	439	100	100	200	100	200	124	116	ND	ND	247	205	190	188	ND	ND	ND
LF1	440	100	100	200	100	200	116	116	179	172	247	223	188	181	ND	ND	ND
LF1	441	100	100	100	100	100	116	113	267	210	247	219	184	175	ND	ND	ND
LF1	442	100	100	100	100	100	120	116	267	232	247	219	175	173	ND	ND	ND
LF1	443	100	100	200	100	100	120	116	ND	ND	247	233	190	181	ND	ND	ND
LF1	444	100	100	100	100	200	120	116	267	176	235	235	184	177	ND	ND	ND
LF1	445	100	100	100	100	200	116	116	261	172	247	239	190	177	ND	ND	ND
LF1	446	100	100	100	100	200	120	116	210	176	219	205	175	173	ND	ND	ND
LF1	447	100	100	100	100	100	124	116	217	208	247	239	181	175	ND	ND	ND
LF1	448	100	100	100	100	200	120	116	253	253	239	231	184	177	ND	ND	ND
LF1	449	100	100	100	200	200	120	113	232	210	247	235	181	181	ND	ND	ND
LF1	450	100	100	200	100	200	124	116	288	179	239	205	190	181	ND	ND	ND
LF1	451	100	100	100	100	100	120	116	247	232	239	215	190	181	ND	ND	ND
LF1	452	100	100	200	100	200	120	116	232	227	233	205	188	188	ND	ND	ND
LF1	453	100	100	100	100	200	116	116	255	247	255	239	177	173	ND	ND	ND
LF1	454	100	100	200	100	100	120	116	222	172	247	205	175	173	ND	ND	ND

## Sheet: Lillafüred-2
Population	Sample	CRmtDNA	SL		LDH		BFRO002		OMM1064		Ssa408uos		SsoSL417		SsoSL438		sdY marker
LF2	518	200	100	100	100	100	ND	ND	ND	ND	272	258	177	173	105	110	0
LF2	519	100	100	100	100	100	ND	ND	288	192	243	239	181	177	105	112	0
LF2	520	100	200	200	100	100	ND	ND	ND	ND	258	250	177	171	105	110	0
LF2	521	100	100	200	100	100	116	120	245	186	243	239	ND	ND	105	105	1
LF2	522	100	100	100	100	200	ND	ND	236	222	258	235	190	177	105	105	0
LF2	523	100	100	100	100	200	ND	ND	296	288	255	239	ND	ND	105	112	1
LF2	524	100	100	100	100	200	120	124	278	192	235	223	ND	ND	105	106	0
LF2	525	200	100	100	100	200	116	124	278	261	239	235	175	175	105	105	0
LF2	526	100	100	100	100	100	ND	ND	ND	ND	258	239	181	171	105	110	0
LF2	527	200	100	200	100	100	116	120	ND	ND	ND	ND	190	181	108	110	1
LF2	528	100	100	100	100	100	ND	ND	337	197	ND	ND	190	181	110	110	1
LF2	529	100	200	200	100	200	116	120	ND	ND	ND	ND	177	175	110	110	1
LF2	530	100	100	100	100	100	ND	ND	255	253	235	233	177	171	ND	ND	1
LF2	531	200	100	200	100	100	ND	ND	ND	ND	223	219	181	177	110	110	1
LF2	532	200	200	200	100	100	ND	ND	ND	ND	258	223	181	177	105	110	1
LF2	533	200	100	200	100	100	ND	ND	ND	ND	258	223	181	171	105	110	0
LF2	534	100	100	100	100	100	116	120	288	186	258	250	171	171	105	108	0
LF2	535	100	100	200	100	100	116	124	ND	ND	301	250	ND	ND	105	108	0
LF2	536	100	100	100	100	100	ND	ND	261	184	301	266	181	181	110	110	1
LF2	537	100	100	100	100	200	ND	ND	253	284	239	223	181	181	105	108	0
LF2	538	100	100	100	100	100	116	120	253	232	258	250	177	171	105	108	0
LF2	539	ND	ND	ND	ND	ND	ND	ND	ND	ND	ND	ND	ND	ND	ND	ND	ND
LF2	540	200	100	200	100	100	116	120	ND	ND	258	223	177	173	105	110	0
LF2	541	100	100	100	100	100	ND	ND	ND	ND	301	239	175	171	105	110	0
LF2	542	200	100	100	100	100	116	124	ND	ND	258	250	173	171	108	110	1
LF2	543	200	100	200	100	100	ND	ND	ND	ND	239	223	173	171	105	110	1
LF2	544	100	100	200	100	200	116	116	232	232	239	239	ND	ND	105	112	1
LF2	545	100	100	200	100	100	ND	ND	232	286	258	258	171	171	105	108	1
LF2	546	100	200	200	100	100	116	116	ND	ND	239	239	171	171	105	110	1
LF2	547	200	100	200	100	100	120	116	ND	ND	272	258	190	171	105	110	1
LF2	548	200	100	200	100	100	116	116	ND	ND	258	250	181	173	105	108	1
LF2	549	100	100	100	100	100	120	120	245	186	255	235	190	177	105	110	0
LF2	550	100	100	100	100	100	116	116	ND	ND	262	258	177	177	105	110	1
LF2	551	100	100	100	100	100	ND	ND	255	172	301	250	190	173	108	110	0
LF2	552	200	100	200	100	100	116	116	ND	ND	258	250	181	171	105	108	1
LF2	553	100	100	100	100	200	116	116	ND	ND	262	250	181	181	108	110	0
LF2	554	100	100	200	100	100	116	116	ND	ND	258	239	171	171	110	112	1
LF2	555	100	200	200	100	200	124	116	ND	ND	239	235	192	177	105	110	1
LF2	556	100	100	200	100	200	116	116	ND	ND	258	233	181	171	105	110	0
LF2	557	200	100	100	100	100	ND	ND	288	178	301	239	181	181	105	110	0
LF2	558	100	100	100	100	100	116	120	ND	ND	ND	ND	ND	ND	108	110	1
LF2	559	100	100	100	100	100	116	116	255	186	262	239	184	177	105	105	0
LF2	560	100	100	200	100	100	ND	ND	ND	ND	258	250	177	171	105	108	1
LF2	561	100	100	100	100	100	124	116	271	255	262	258	184	171	105	105	1
LF2	562	200	100	200	100	100	116	116	ND	ND	239	231	190	171	110	110	1
LF2	563	200	200	200	100	100	120	116	ND	ND	258	223	181	177	105	105	0
LF2	564	100	100	200	100	200	116	116	278	168	239	227	190	177	108	110	1
LF2	565	100	100	100	100	100	120	116	288	253	258	250	177	171	105	108	1
LF2	567	100	100	100	100	100	116	116	288	186	258	250	190	177	ND	ND	0
LF2	568	200	100	100	100	100	120	116	ND	ND	223	219	181	177	110	110	0
LF2	569	200	100	200	100	100	116	116	ND	ND	272	258	177	171	105	110	0
LF2	570	100	200	200	100	100	116	116	ND	ND	258	239	177	171	105	110	0
LF2	571	100	100	100	100	200	116	116	ND	ND	233	227	ND	ND	105	105	0
LF2	572	200	100	100	100	100	120	116	ND	ND	250	223	190	177	108	110	1
LF2	573	200	100	200	100	100	120	116	ND	ND	272	239	181	171	105	110	0
LF2	574	100	100	200	100	200	116	116	ND	ND	296	258	192	181	105	110	0
LF2	575	100	100	200	100	100	116	116	ND	ND	258	250	171	171	105	110	1
LF2	576	100	100	100	100	200	124	116	278	238	258	235	181	177	105	108	1
LF2	577	200	200	200	100	100	ND	ND	ND	ND	239	223	190	181	110	110	0
LF2	578	100	100	200	100	100	116	116	ND	ND	258	239	171	171	105	108	1
LF2	579	100	100	200	100	200	120	116	ND	ND	247	239	177	177	110	110	1
LF2	580	100	100	100	100	100	116	116	197	178	250	208	192	177	108	108	1
LF2	581	100	100	100	100	200	116	116	245	186	237	231	177	173	106	112	1
LF2	582	200	100	200	100	200	116	116	178	172	301	239	181	181	105	110	1
LF2	583	100	100	200	100	200	116	116	201	176	301	227	177	175	105	112	1
LF2	584	100	100	100	100	100	116	116	ND	ND	239	208	ND	ND	108	110	1
LF2	585	200	100	100	100	100	ND	ND	ND	ND	239	223	173	171	105	110	1
LF2	586	100	100	100	100	200	120	116	178	172	239	231	175	173	105	110	0
LF2	587	200	200	200	100	100	116	116	ND	ND	272	258	181	177	105	110	0
LF2	588	200	100	100	100	200	120	116	ND	ND	239	223	181	177	110	110	1
LF2	589	100	100	100	100	200	116	116	ND	ND	258	255	175	171	105	110	1
LF2	590	200	100	200	100	100	116	116	ND	ND	269	239	177	177	105	110	1
LF2	591	200	200	200	100	100	116	116	ND	ND	239	223	181	177	105	110	1
LF2	592	100	100	200	100	100	116	116	ND	ND	272	233	177	177	110	110	1
LF2	593	200	100	100	100	100	116	116	ND	ND	239	223	181	177	110	110	1
LF2	594	200	100	100	100	100	116	116	ND	ND	272	239	190	177	105	112	1
LF2	595	200	100	200	100	100	120	116	255	228	258	239	190	181	105	112	1
LF2	596	200	100	100	100	100	120	116	ND	ND	272	239	181	177	105	110	1
LF2	597	200	100	200	100	100	116	116	ND	ND	239	223	177	177	105	110	1
LF2	598	200	100	200	100	100	116	116	ND	ND	272	239	177	171	105	110	1
LF2	599	100	100	200	100	100	116	116	288	253	258	239	171	171	105	108	1
LF2	600	200	100	200	100	100	116	116	ND	ND	239	223	ND	ND	105	110	1
LF2	601	100	100	100	100	100	120	116	288	253	258	258	190	171	105	108	0
LF2	602	100	100	100	100	100	124	116	255	182	262	258	184	171	105	110	0
LF2	603	100	100	200	100	100	116	116	ND	ND	ND	ND	ND	ND	105	110	0
LF2	604	100	100	100	100	100	116	116	253	232	258	250	177	171	105	108	0
LF2	605	200	100	200	100	100	116	116	ND	ND	258	223	173	171	105	110	1
LF2	606	100	100	100	100	100	124	116	255	172	262	258	190	173	105	105	1
LF2	607	200	100	100	100	100	120	116	271	232	258	223	173	171	105	110	1
LF2	608	100	100	200	100	100	120	116	288	253	258	250	177	171	105	108	1
LF2	609	200	200	200	100	100	116	116	ND	ND	258	223	177	177	105	110	1
LF2	610	200	100	100	100	100	116	116	ND	ND	239	223	177	171	105	110	0
LF2	611	100	100	100	100	100	116	116	ND	ND	250	239	173	171	108	110	1
LF2	612	200	100	200	100	100	116	116	ND	ND	239	223	177	171	105	110	0
LF2	613	200	100	200	100	100	116	116	ND	ND	258	223	177	171	105	110	1
LF2	614	200	100	100	100	100	116	116	ND	ND	258	223	177	171	105	110	1
LF2	615	200	100	100	100	100	116	116	ND	ND	258	223	190	171	105	110	1
LF2	616	200	200	200	100	100	116	120	212	253	223	258	173	177	105	110	0
LF2	617	200	200	200	100	100	116	116	186	212	223	258	171	181	105	110	0
LF2	618	200	100	200	100	100	116	120	208	253	223	258	171	173	105	110	1
LF2	619	100	100	200	100	100	116	116	232	245	211	231	177	181	105	106	0
LF2	620	200	100	200	100	100	116	116	186	212	258	272	177	177	105	110	0
LF2	621	200	100	200	100	100	116	116	186	212	258	272	177	177	105	110	0
LF2	622	200	100	100	100	100	116	120	230	253	239	258	177	181	105	105	1
LF2	623	200	100	100	100	100	116	124	208	255	223	258	171	173	105	105	0
LF2	624	200	100	200	100	100	116	116	208	212	223	239	181	190	110	110	0
LF2	625	200	200	200	100	100	116	116	212	253	223	258	171	190	105	110	0
LF2	626	200	200	200	100	100	116	116	208	214	239	272	177	190	ND	ND	0
LF2	627	200	100	200	100	100	116	120	186	208	258	272	171	173	105	110	0
LF2	628	200	100	200	100	100	116	116	208	228	223	239	181	190	110	110	0
LF2	629	200	100	200	100	100	116	120	212	253	239	272	173	177	105	110	0
LF2	630	200	200	200	100	100	116	116	186	212	258	272	177	181	105	110	0
LF2	631	200	200	200	100	100	116	116	186	212	239	272	173	177	105	110	0
LF2	632	100	100	200	100	100	116	116	186	208	239	239	171	181	105	110	0
LF2	633	200	100	200	100	100	116	120	186	208	258	272	171	173	105	110	0
LF2	634	100	100	100	100	100	116	116	168	210	239	258	ND	ND	ND	ND	0
LF2	635	100	100	100	100	100	116	116	ND	ND	239	255	ND	ND	105	112	1
LF2	636	200	100	100	100	100	116	116	168	172	239	301	171	181	105	110	1
LF2	637	100	100	100	100	100	116	116	168	228	239	258	175	181	105	110	1
LF2	638	100	100	100	100	200	116	120	208	245	239	243	177	181	110	110	1
LF2	639	100	100	200	100	100	116	116	197	201	250	258	177	177	105	108	0
LF2	640	100	100	200	100	200	116	120	ND	ND	ND	ND	ND	ND	108	110	0
LF2	641	100	200	200	100	100	116	116	210	253	239	250	ND	ND	105	108	1
LF2	642	200	100	100	100	100	116	120	208	253	258	272	177	181	105	110	0
LF2	643	100	100	200	100	100	116	116	197	253	258	272	177	181	105	110	0
LF2	644	200	100	200	100	100	116	116	208	214	239	272	181	190	110	110	0
LF2	645	100	100	100	100	200	116	120	187	253	205	239	175	175	112	112	1
LF2	646	100	100	100	100	100	116	120	253	288	250	258	177	190	105	108	1
LF2	647	200	100	200	100	100	116	120	186	210	258	272	ND	ND	110	110	1
LF2	648	100	100	100	100	200	116	116	253	253	255	258	171	181	105	110	1
LF2	649	200	100	100	100	100	116	116	253	255	233	258	171	181	105	110	1
LF2	650	100	100	100	100	200	116	116	182	281	227	231	177	190	108	110	0
LF2	651	100	100	100	100	100	116	116	184	247	239	239	ND	ND	101	105	0
LF2	652	100	100	200	100	100	116	124	ND	ND	239	301	ND	ND	105	110	0
LF2	653	200	100	100	100	100	116	116	186	232	239	258	ND	ND	105	105	0
LF2	654	200	100	200	100	100	116	116	208	253	223	258	171	177	105	110	0
LF2	655	100	100	100	100	100	116	120	185	232	205	235	175	175	110	112	0
LF2	656	200	200	200	100	100	116	116	208	212	223	250	177	190	110	112	1
LF2	657	200	100	200	100	100	116	116	208	212	223	239	171	177	ND	ND	0
LF2	658	100	100	100	100	100	116	124	255	271	258	262	173	190	105	105	1
LF2	659	200	100	200	100	100	116	120	208	253	239	272	171	181	105	110	1
LF2	660	200	100	200	100	100	116	120	212	253	223	258	177	181	105	110	1
LF2	661	200	200	200	100	100	116	120	208	253	223	239	173	177	105	110	1
LF2	662	100	100	200	200	200	116	120	232	232	266	250	181	181	105	110	1
LF2	663	100	100	100	100	200	116	116	172	253	233	258	177	177	105	110	0
LF2	664	200	100	100	100	100	116	120	186	212	223	258	171	173	105	110	0
LF2	665	100	200	200	100	200	116	120	215	240	250	262	181	181	108	110	1
LF2	666	200	100	100	100	100	ND	ND	186	208	223	258	171	177	105	105	0
LF2	667	100	100	100	100	200	116	116	178	288	243	243	ND	ND	106	106	1
LF2	668	200	100	200	100	100	116	120	186	208	223	239	177	181	105	110	0
LF2	669	200	200	200	100	100	116	116	215	215	223	250	177	181	108	110	0
LF2	670	200	200	200	100	100	116	120	186	214	258	258	ND	ND	105	110	0
LF2	671	100	100	100	100	200	116	116	225	232	231	243	173	177	106	110	1
LF2	672	100	100	200	100	100	116	116	215	245	243	250	175	181	105	108	1
LF2	673	200	100	100	100	100	116	116	208	208	239	272	177	190	110	110	1
LF2	674	200	100	100	100	100	116	116	184	261	208	215	181	192	105	105	1
LF2	675	100	100	100	100	100	116	120	ND	ND	223	301	ND	ND	108	108	1
LF2	676	200	100	200	100	100	116	120	186	230	239	258	171	171	105	105	1
LF2	677	200	100	200	100	100	116	116	208	253	258	272	171	173	105	110	1
LF2	678	100	100	100	100	200	116	120	232	232	250	266	181	181	105	110	1
LF2	679	100	100	200	100	100	116	116	186	208	239	258	171	181	105	110	1
LF2	680	200	100	200	100	100	116	116	212	228	239	272	177	181	110	110	1
LF2	681	200	200	200	100	100	116	120	186	208	258	272	171	181	105	110	1
LF2	682	100	100	200	200	200	116	124	227	281	227	239	175	175	105	110	1
LF2	683	200	100	100	100	100	116	116	186	212	223	227	171	181	105	110	1
LF2	684	200	100	200	100	200	116	120	172	178	243	301	171	181	106	110	1
LF2	685	100	100	100	100	200	116	116	176	232	205	239	177	181	110	110	1
LF2	686	100	100	100	100	100	116	120	186	232	239	250	171	190	105	108	1
LF2	687	100	200	200	100	100	116	116	215	253	239	258	177	181	105	110	1
LF2	688	100	100	200	100	200	116	116	168	184	223	301	181	181	101	108	0
LF2	689	100	100	100	100	100	116	120	186	236	250	262	177	190	105	110	0
LF2	690	200	100	200	100	100	116	120	208	253	258	272	171	181	105	110	1
LF2	691	100	100	100	100	100	116	116	184	230	243	266	ND	ND	110	112	0
LF2	692	200	100	200	100	100	116	116	212	253	223	258	173	177	106	110	1
LF2	693	200	100	200	100	100	116	116	186	215	223	239	ND	ND	105	110	0
LF2	694	100	100	100	100	100	116	120	208	253	233	272	171	181	110	110	1
LF2	695	100	100	100	100	100	116	120	208	208	233	272	177	181	110	110	0
LF2	696	100	100	100	100	100	116	124	168	228	239	258	175	181	108	110	0
LF2	697	200	100	200	100	100	116	116	212	253	223	239	177	181	110	110	1
LF2	698	200	100	200	100	100	116	116	212	253	223	258	171	177	105	110	1
LF2	699	100	100	200	100	100	120	120	197	269	250	272	177	181	110	116	0
LF2	700	100	100	200	100	100	116	116	225	232	211	231	171	190	106	112	0
LF2	701	100	100	200	100	100	ND	ND	232	245	211	231	177	181	ND	ND	1
LF2	702	200	100	200	100	100	116	120	186	212	223	239	173	177	ND	ND	1
LF2	703	100	100	200	100	100	116	124	201	208	239	258	171	171	ND	ND	1
LF2	704	100	100	200	100	100	120	120	197	269	243	250	177	181	ND	ND	1
LF2	705	100	200	200	100	200	116	120	208	240	239	262	177	181	ND	ND	1
LF2	706	100	100	100	100	200	116	116	225	238	258	281	177	177	ND	ND	1
LF2	707	200	100	200	100	200	116	116	176	208	247	272	177	177	ND	ND	1
LF2	708	100	100	100	100	200	116	124	197	222	235	243	175	181	ND	ND	1
LF2	709	100	100	200	100	200	116	120	208	240	239	262	171	171	110	110	1
LF2	710	100	200	200	100	100	116	116	186	240	258	262	171	175	105	110	1
LF2	711	200	100	200	100	100	116	116	212	228	239	272	171	177	110	110	0
LF2	712	200	100	200	100	100	116	116	212	228	250	272	171	190	108	110	0
LF2	713	100	100	200	100	100	116	116	ND	ND	ND	ND	ND	ND	105	108	1
LF2	714	200	100	200	100	100	116	116	208	212	250	272	177	181	108	110	0
LF2	715	200	100	200	100	100	116	116	186	212	239	272	171	181	105	110	1
LF2	716	100	100	100	100	200	116	116	232	232	239	239	175	181	105	105	1
LF2	717	200	100	200	100	100	116	120	186	212	258	272	177	181	105	110	1
LF2	718	100	100	200	100	100	116	116	ND	ND	ND	ND	ND	ND	108	110	0
LF2	719	100	100	100	100	100	ND	ND	ND	ND	ND	ND	ND	ND	108	110	0
LF2	720	100	100	100	100	100	116	120	186	232	243	262	171	190	105	108	0
LF2	721	100	100	100	100	100	116	120	176	253	231	274	175	181	106	110	0
LF2	722	100	100	100	100	100	116	120	ND	ND	ND	ND	171	177	105	108	0
LF2	723	100	100	100	100	100	116	116	255	255	ND	ND	173	184	108	110	0
LF2	724	100	100	100	100	100	116	120	245	255	213	285	171	175	103	103	0
LF2	725	200	200	200	100	100	116	116	210	210	225	243	177	177	110	110	0
LF2	726	100	100	100	100	100	116	124	ND	ND	ND	ND	171	184	103	103	0
LF2	727	200	100	200	100	100	116	120	215	251	243	274	173	177	105	110	0
LF2	728	200	100	200	100	100	116	116	215	251	227	262	177	181	103	110	0
LF2	729	100	100	100	100	100	116	116	178	288	235	243	171	181	103	110	0
LF2	730	200	100	100	100	100	116	120	210	255	223	235	177	177	105	110	0
LF2	731	100	100	100	100	100	116	116	172	253	262	266	171	184	103	103	0
LF2	732	200	100	200	100	100	116	116	186	214	262	274	171	190	105	110	0
LF2	733	100	100	100	100	200	116	116	232	253	262	262	171	177	105	108	0
LF2	734	100	100	200	100	100	116	120	ND	ND	ND	ND	177	188	106	114	1
LF2	735	200	100	100	100	100	116	116	210	230	225	243	171	190	110	110	0
LF2	736	200	100	200	100	100	116	116	214	214	255	274	177	190	108	110	0
LF2	737	200	100	100	100	100	116	116	172	210	227	255	175	190	106	108	0
LF2	738	200	100	100	100	100	116	124	204	215	274	303	171	190	106	110	0
LF2	739	200	100	200	100	100	116	116	186	212	225	243	177	190	105	110	0
LF2	740	100	100	200	100	100	116	116	186	210	255	262	177	181	105	110	0
LF2	741	200	100	200	100	200	116	116	ND	ND	227	243	171	190	103	112	0
LF2	742	200	100	200	100	200	ND	ND	ND	ND	ND	ND	ND	ND	103	110	0
LF2	743	200	100	200	100	100	116	116	ND	ND	227	255	181	190	108	110	0
LF2	744	200	100	200	100	100	116	116	ND	ND	262	274	171	173	103	110	0
LF2	745	200	100	100	100	100	116	116	210	253	ND	ND	171	177	ND	ND	ND
LF2	746	100	100	100	100	100	116	120	186	288	255	262	171	190	103	108	0
LF2	747	100	100	200	100	100	116	120	ND	ND	243	262	171	190	103	108	0
LF2	748	200	100	100	100	100	116	120	186	210	243	274	173	177	103	110	0
LF2	749	200	100	100	100	100	116	120	172	214	227	255	175	190	108	110	0
LF2	750	200	100	100	100	100	120	120	232	253	239	262	171	175	103	110	0
LF2	751	200	100	100	100	100	120	124	232	274	ND	ND	171	181	ND	ND	ND
LF2	752	200	100	200	100	100	116	116	186	214	243	274	177	177	103	110	0
LF2	753	200	100	200	100	100	116	116	210	253	227	262	171	190	103	110	0
LF2	754	200	200	200	100	200	116	116	186	255	262	266	171	184	103	110	0
LF2	755	100	100	100	100	100	116	120	186	214	227	243	171	173	103	110	0
LF2	756	200	100	200	100	100	116	116	ND	ND	255	262	171	177	103	108	0
LF2	757	200	100	100	100	100	116	120	232	251	243	255	171	190	103	108	0
LF2	758	100	200	200	100	100	116	116	186	214	243	274	173	177	103	110	0
LF2	759	100	100	200	100	100	116	116	210	253	227	262	171	181	103	110	0
LF2	760	200	100	100	100	100	116	120	172	176	239	249	177	177	110	112	1
LF2	761	100	100	200	100	100	116	116	214	251	262	274	173	177	103	110	0

## Sheet: Szilvásvárad
Population	Sample	CRmtDNA	SL		LDH		BFRO002		OMM1064		Ssa408uos		SsoSL417		SsoSL438		sdY marker
SZV	1	100	100	100	100	100	116	120	215	247	231	247	190	190	103	103	0
SZV	2	200	100	100	100	100	116	116	208	208	239	243	190	190	ND	ND	1
SZV	3	200	100	100	100	200	116	120	178	208	243	250	181	190	103	110	1
SZV	4	200	100	200	100	200	116	116	240	261	247	255	177	177	106	112	0
SZV	5	100	100	200	100	100	116	116	247	253	211	243	181	190	112	112	0
SZV	6	100	100	100	100	200	116	120	172	253	243	250	175	181	ND	ND	ND
SZV	7	100	100	100	100	100	116	124	240	253	243	296	190	190	ND	ND	1
SZV	8	100	100	100	100	100	116	120	201	201	243	258	173	181	103	112	0
SZV	9	100	100	100	100	100	116	116	204	214	227	231	177	190	106	108	1
SZV	10	200	100	100	100	100	116	120	288	320	215	255	190	190	ND	ND	0
SZV	11	200	100	200	100	100	116	120	236	261	235	247	181	181	ND	ND	1
SZV	12	100	200	200	100	100	116	120	215	228	231	239	173	190	103	103	0
SZV	13	100	100	100	100	100	116	116	176	281	247	255	173	177	ND	ND	1
SZV	14	100	100	100	100	100	116	116	247	251	243	266	171	181	108	110	1
SZV	15	100	100	200	100	100	120	120	215	320	239	272	171	190	103	103	1
SZV	16	100	100	200	100	100	116	124	218	243	231	247	177	177	110	112	1
SZV	17	200	100	200	100	100	116	120	217	261	231	250	171	177	103	108	1
SZV	18	100	100	100	100	200	116	116	178	228	243	250	177	181	ND	ND	1
SZV	19	100	100	100	100	100	116	116	228	253	243	258	173	181	ND	ND	1
SZV	20	100	100	100	100	200	116	120	217	271	231	239	171	190	103	103	1
SZV	21	100	100	100	100	200	116	120	191	253	239	255	171	177	103	103	0
SZV	22	100	100	100	100	100	116	124	184	253	239	239	175	184	103	112	1
SZV	23	200	100	100	100	100	116	116	215	240	243	250	173	181	103	110	1
SZV	24	100	100	100	100	100	116	116	172	240	231	235	179	181	103	103	1
SZV	25	100	100	100	100	100	116	116	240	261	250	262	177	190	99	110	1
SZV	26	100	200	200	100	200	116	116	168	208	223	235	177	181	106	110	ND
SZV	27	200	100	100	100	200	116	116	197	258	235	272	175	181	ND	ND	ND
SZV	28	100	100	200	100	100	116	116	247	253	227	239	177	190	106	114	1
SZV	29	100	100	100	100	200	116	116	187	255	239	243	177	181	110	112	ND
SZV	30	100	100	100	100	200	116	124	215	253	239	250	175	175	106	110	1
SZV	31	200	100	100	100	100	116	116	192	208	239	239	181	190	ND	ND	0
SZV	32	100	200	200	100	100	116	116	172	240	247	255	177	181	103	106	0
SZV	33	100	100	200	100	100	116	120	172	243	243	250	177	181	108	110	1
SZV	34	100	100	100	100	100	120	120	245	261	239	301	171	177	106	110	ND
SZV	35	200	100	200	100	200	116	120	228	247	250	250	190	194	108	110	1
SZV	36	100	100	100	100	100	116	116	230	253	235	243	181	190	103	110	ND
SZV	37	100	100	200	200	200	116	116	172	230	243	272	173	175	103	110	1
SZV	38	100	100	200	100	200	116	116	184	281	243	255	173	190	103	103	0
SZV	39	100	100	200	100	100	120	120	245	255	235	262	175	181	103	110	1
SZV	40	100	100	100	100	200	116	116	253	281	255	301	173	177	ND	ND	1
SZV	41	100	100	200	100	200	ND	ND	184	236	208	231	177	181	103	106	ND
SZV	42	100	100	200	100	100	116	120	217	331	231	239	171	190	103	110	1
SZV	43	100	100	100	100	100	116	120	176	253	215	255	171	171	108	112	1
SZV	44	200	100	100	100	100	116	116	197	247	208	235	181	181	103	110	ND
SZV	45	100	100	100	100	200	116	116	172	320	231	239	177	190	110	110	1
SZV	46	200	100	200	100	100	116	120	215	236	208	272	171	177	ND	ND	1
SZV	47	200	100	200	100	100	116	120	172	255	211	215	181	190	ND	ND	1
SZV	48	100	200	200	100	200	116	120	214	232	239	239	181	190	103	103	1
SZV	49	100	100	100	100	200	116	116	222	243	250	250	177	190	103	110	1
SZV	50	100	100	100	100	100	116	116	172	214	235	247	173	181	110	112	ND
SZV	51	100	100	100	100	100	116	116	253	255	239	255	181	190	108	110	0
SZV	52	100	100	100	100	200	116	116	176	228	255	272	175	181	108	108	0
SZV	53	100	100	100	100	200	116	116	179	204	239	250	177	190	106	110	1
SZV	54	200	100	200	100	100	116	120	215	236	250	272	175	190	103	108	1
SZV	55	100	100	100	100	200	116	116	172	238	250	262	177	184	ND	ND	1
SZV	56	100	100	200	100	100	116	116	255	320	239	272	175	181	108	112	1
SZV	57	100	100	100	100	100	116	120	172	255	247	262	181	181	ND	ND	0
SZV	58	100	100	100	100	200	116	120	247	255	239	243	175	177	103	110	ND
SZV	59	200	100	200	100	200	116	116	243	271	239	250	173	190	103	110	1
SZV	60	100	100	100	100	100	116	124	218	236	231	250	175	177	110	110	0
SZV	61	100	100	100	100	100	116	116	178	243	231	250	177	184	103	110	0
SZV	62	100	100	200	100	100	116	116	176	320	215	239	181	184	108	112	1
SZV	63	200	100	200	100	200	116	116	253	255	239	301	171	181	103	110	0
SZV	64	100	100	100	100	200	116	120	178	253	239	272	181	181	108	112	1
SZV	65	100	100	100	100	100	116	116	232	238	235	239	177	181	103	110	0
SZV	66	100	100	100	100	200	116	116	184	255	239	247	177	177	110	110	ND
SZV	67	200	100	200	100	200	116	116	230	236	239	247	173	177	103	112	0
SZV	68	100	100	100	100	100	116	116	168	238	243	250	175	175	103	110	1
SZV	69	100	100	100	100	200	116	116	240	240	243	247	181	190	106	110	0
SZV	70	100	100	200	100	200	116	120	217	247	231	243	175	190	103	103	0
SZV	71	100	100	100	100	100	116	120	172	217	231	247	190	190	103	110	1
SZV	72	100	100	100	100	200	116	124	172	218	239	250	177	190	ND	ND	1
SZV	73	100	100	200	100	100	ND	ND	218	236	231	250	173	175	110	110	1
SZV	74	100	100	200	100	100	116	116	176	232	239	301	181	190	103	110	1
SZV	75	100	100	200	100	200	116	116	253	271	211	255	177	177	103	108	ND

## Sheet: Bán
Population	Sample	CRmtDNA	SL		LDH		BFRO002		OMM1064		Ssa408uos		SsoSL417		SsoSL438		sdY marker
BA	1	ND	ND	ND	ND	ND	116	116	205	189	247	208	181	175	ND	ND	0
BA	2	100	100	200	100	100	116	116	261	178	227	247	177	177	ND	ND	1
BA	3	100	100	200	100	200	120	116	223	215	208	205	177	161	ND	ND	0
BA	4	100	100	200	100	200	116	113	248	167	255	205	ND	ND	106	114	1
BA	5	100	200	200	100	200	116	113	253	240	258	236	ND	ND	106	114	1
BA	6	100	100	100	100	200	120	113	247	167	258	236	184	177	ND	ND	1
BA	7	100	100	100	100	200	116	113	253	248	233	236	181	177	ND	ND	1
BA	8	100	100	200	100	200	120	116	227	223	208	205	171	161	103	112	0
BA	9	100	100	200	100	100	120	120	253	247	258	236	175	173	110	112	1
BA	10	100	100	200	100	100	120	116	240	205	239	205	195	177	106	112	1
BA	11	100	100	100	100	200	120	116	247	208	247	243	181	175	ND	ND	1
BA	12	100	100	200	100	100	116	113	253	208	236	219	181	173	110	110	1
BA	13	100	100	100	100	100	120	116	232	167	205	205	195	184	103	106	1
BA	14	100	100	100	100	100	116	116	208	189	236	219	184	181	ND	ND	1
BA	15	100	100	200	100	200	116	116	240	222	205	205	188	184	106	112	1
BA	16	100	100	200	100	200	120	116	261	205	284	233	184	171	106	112	1
BA	17	100	200	200	100	200	124	120	223	215	247	208	173	171	110	112	1
BA	18	ND	ND	ND	100	100	116	116	189	189	250	208	184	181	106	112	0
BA	19	100	100	100	100	100	116	113	223	167	250	247	175	171	106	112	0
BA	20	100	100	100	100	200	116	116	261	167	247	233	177	171	106	112	0
BA	21	200	100	200	100	100	120	116	253	253	236	205	173	161	ND	ND	1
BA	22	200	100	200	100	200	116	113	221	167	236	205	175	173	106	112	0
BA	23	100	100	100	200	200	120	113	240	167	239	205	177	173	103	110	0
BA	24	100	100	100	100	200	116	116	253	223	236	219	184	171	106	110	1
BA	25	100	ND	ND	100	100	120	116	240	167	255	247	177	171	106	112	1

## Sheet: Jósva
Population	Sample	CRmtDNA	SL		LDH		BFRO002		OMM1064		Ssa408uos		SsoSL417		SsoSL438		sdY marker
JO	26	100	100	100	100	100	116	116	193	176	239	208	ND	ND	ND	ND	0
JO	27	200	100	100	100	100	116	116	277	189	239	239	181	181	ND	ND	1
JO	28	100	100	100	100	200	116	116	261	247	211	211	171	171	ND	ND	0
JO	29	200	100	100	100	100	120	116	277	189	247	239	175	171	ND	ND	0
JO	30	100	100	100	100	100	116	116	189	172	247	211	181	171	ND	ND	1
JO	31	100	100	200	100	100	116	116	316	265	247	211	195	177	ND	ND	1
JO	32	100	100	100	100	200	116	116	316	265	250	239	181	177	103	116	1
JO	33	100	100	200	100	100	124	124	223	215	239	236	190	181	103	116	1
JO	34	200	100	200	100	100	116	116	240	219	255	205	184	177	ND	ND	1
JO	35	100	100	200	100	200	116	116	172	172	239	211	190	175	103	103	1
JO	36	100	100	200	100	100	116	116	272	255	255	239	181	171	103	106	1
JO	37	100	100	200	100	100	116	116	253	176	255	243	181	181	112	112	1
JO	38	100	100	100	100	100	116	116	316	219	243	211	181	181	106	112	1
JO	39	100	100	100	100	100	116	116	255	255	239	239	181	171	ND	ND	1
JO	40	100	100	200	100	200	116	116	316	189	243	236	181	175	103	112	0
JO	41	100	100	100	100	200	120	116	250	219	219	205	188	171	103	114	1
JO	42	100	100	100	100	100	116	116	255	240	243	208	181	181	112	112	0
JO	43	100	100	100	100	100	116	116	261	240	253	239	181	181	ND	ND	1
JO	44	100	100	100	100	100	116	116	253	219	243	243	188	175	103	112	0
JO	45	100	100	100	100	100	120	116	255	250	247	208	188	175	103	112	1
JO	46	100	100	100	100	100	116	116	255	253	243	208	181	175	103	112	0
JO	47	100	100	100	100	100	116	116	250	228	208	205	175	175	103	112	1
JO	48	100	100	200	100	100	116	116	240	214	273	247	190	181	103	103	0
JO	49	100	ND	ND	100	100	116	116	205	189	243	215	181	175	ND	ND	0
JO	50	100	100	100	100	100	116	116	316	250	250	243	190	188	103	106	1
JO	51	100	100	200	100	100	116	116	316	240	243	208	188	181	103	112	1
JO	52	100	100	100	100	100	116	116	261	215	253	211	175	171	103	106	1
JO	53	100	100	100	100	100	116	116	261	172	239	205	181	171	103	106	0
JO	54	100	100	200	100	100	116	116	223	193	247	243	188	181	103	103	1
JO	55	100	100	100	100	200	116	116	255	182	239	239	188	184	103	112	1
JO	56	100	100	100	100	200	116	116	316	172	233	208	188	175	106	112	0
JO	57	100	100	100	100	100	116	116	253	223	260	211	175	161	103	110	1
JO	58	100	100	200	100	100	116	116	247	208	253	239	184	181	103	103	0

## Sheet: Kemence
Population	Sample	CRmtDNA	SL		LDH		BFRO002		OMM1064		Ssa408uos		SsoSL417		SsoSL438		sdY marker
KE	1	100	100	200	100	200	120	116	ND	ND	258	247	177	177	110	112	0
KE	2	100	100	200	100	100	116	116	208	208	247	235	195	177	110	112	0
KE	3	100	100	100	100	200	120	116	ND	ND	ND	ND	177	171	108	112	0
KE	4	100	100	200	100	100	116	116	187	187	235	223	171	171	110	112	0
KE	5	100	100	200	100	200	120	116	245	218	239	235	195	177	108	108	1
KE	6	100	100	100	100	200	120	116	265	187	235	223	177	171	ND	ND	0
KE	7	100	100	200	100	200	120	116	240	187	247	235	177	175	110	112	0
KE	8	100	100	200	100	100	120	116	218	187	258	235	177	177	108	112	0
KE	9	100	100	200	100	100	116	116	245	187	250	239	177	177	108	112	1
KE	10	100	100	200	100	100	116	116	208	162	247	205	177	177	106	110	0
KE	11	200	100	200	100	200	116	116	253	197	239	211	171	171	110	112	0
KE	12	100	100	200	100	100	116	116	187	187	219	205	195	177	106	112	0
KE	13	100	100	200	100	100	120	116	187	187	219	219	195	177	112	112	1
KE	14	100	100	200	100	100	116	116	261	245	247	235	175	171	110	112	0
KE	15	100	100	100	100	200	120	116	208	162	239	219	195	177	108	112	0
KE	16	100	100	200	100	200	116	116	245	240	258	250	175	171	110	112	0
KE	17	100	100	100	100	100	116	116	208	187	235	235	177	171	112	112	1
KE	18	100	100	200	100	200	116	116	208	187	258	250	171	171	106	108	1
KE	19	100	100	200	100	100	120	116	265	218	250	235	177	171	110	112	1
KE	20	100	100	200	100	200	120	120	208	187	235	235	177	171	ND	ND	1
KE	21	100	100	200	100	200	120	116	261	187	250	235	171	171	106	112	1
KE	22	100	100	200	100	200	120	116	208	187	250	235	177	177	108	108	1
KE	23	100	100	200	100	200	120	116	218	218	235	235	177	177	110	112	1
KE	24	100	100	200	100	200	120	120	245	208	250	235	177	177	108	112	1

## Sheet: Apátkút
Population	Sample	CRmtDNA	SL		LDH		BFRO002		OMM1064		Ssa408uos		SsoSL417		SsoSL438		sdY marker
AK	1	200	100	200	100	100	116	116	247	219	262	239	184	171	110	110	0
AK	2	200	100	200	100	100	116	116	247	247	239	239	184	171	110	112	1
AK	3	100	100	100	100	100	116	116	238	197	239	239	193	193	106	112	0
AK	4	200	200	200	100	100	116	116	219	168	262	208	181	177	106	106	1
AK	5	100	100	100	100	100	124	116	219	168	255	239	181	175	110	112	1
AK	6	200	100	200	100	200	116	116	253	243	247	219	190	184	110	112	1
AK	7	200	100	200	100	100	116	116	247	166	239	239	177	171	110	112	0
AK	8	200	100	100	100	100	116	116	247	219	262	239	175	171	110	112	0
AK	9	200	100	200	100	200	116	116	ND	ND	ND	ND	ND	ND	110	112	1
AK	10	200	100	200	100	100	116	116	247	187	262	219	184	181	110	110	0
AK	11	200	100	100	100	100	116	116	253	219	239	239	190	184	110	110	0
AK	12	200	100	100	100	100	116	116	253	247	239	208	190	171	106	112	1
AK	13	100	100	200	100	100	120	116	253	243	247	215	190	177	110	110	0
AK	14	200	100	200	100	200	116	116	253	243	239	239	190	190	112	112	1
AK	15	200	100	200	100	200	116	116	219	214	239	239	190	184	106	112	0
AK	16	100	100	200	100	100	116	116	253	166	239	239	177	177	110	110	1
AK	17	100	100	100	100	100	116	116	166	160	262	219	193	184	106	110	0
AK	18	200	100	200	100	200	116	116	253	214	262	239	190	190	106	112	0
AK	19	200	100	200	100	200	116	116	243	219	239	239	190	173	112	112	1
AK	20	200	100	100	100	100	116	116	238	224	239	215	184	184	110	110	1
AK	21	100	100	100	100	100	116	116	253	238	239	219	193	177	106	110	1
AK	22	100	100	100	100	100	120	116	253	253	239	215	193	177	110	112	0
AK	23	200	100	100	100	100	116	116	238	224	255	219	193	193	103	110	0
AK	24	100	100	100	100	100	116	116	247	219	255	239	184	181	110	110	1
AK	25	100	100	200	100	100	116	116	238	166	239	215	171	171	110	110	1
AK	26	200	100	100	100	100	120	116	218	166	276	219	184	171	106	110	1
AK	28	100	100	100	100	100	116	116	247	166	239	219	184	171	106	106	0
AK	29	100	100	100	100	200	116	116	247	166	239	239	184	171	110	112	1
AK	30	100	100	100	100	200	120	116	253	224	223	223	193	181	108	110	1
AK	31	100	100	100	100	100	120	116	238	224	239	223	193	184	106	108	0
AK	32	100	100	100	100	200	124	116	253	253	239	223	184	171	112	112	1
AK	33	100	100	100	100	200	124	116	253	253	247	223	184	171	110	112	0
AK	34	100	100	100	100	200	124	116	253	166	247	239	190	184	110	112	0
AK	35	100	100	100	100	200	120	116	243	166	239	223	184	184	112	112	1
AK	36	100	100	100	100	100	116	116	243	160	255	223	193	177	106	112	1
AK	37	100	100	100	200	200	116	116	197	166	255	239	184	177	110	112	1
AK	38	100	100	200	100	100	116	116	243	160	239	239	193	184	106	112	1
AK	39	100	100	100	100	100	116	116	253	224	255	239	193	177	106	110	1
AK	40	100	100	100	200	200	116	116	238	160	239	223	193	181	103	108	1
AK	41	100	100	100	100	100	120	116	247	247	262	255	193	181	110	110	1
AK	42	100	100	100	100	100	120	116	ND	ND	ND	ND	ND	ND	110	112	1
AK	43	100	100	100	100	100	116	116	247	197	262	255	184	181	110	110	0
AK	44	100	100	200	100	100	116	116	243	160	239	239	193	184	106	112	0
AK	45	100	100	100	100	100	116	116	238	160	255	239	181	171	103	110	0
AK	46	100	100	100	200	200	116	116	253	160	ND	ND	193	181	103	110	0
AK	47	100	100	100	100	100	116	116	253	238	239	219	193	177	110	110	0
AK	48	100	100	100	100	200	116	116	238	214	223	215	193	171	108	110	0
AK	49	100	100	200	100	100	116	116	238	197	262	219	184	171	110	112	1
AK	50	100	100	100	100	100	116	116	238	208	239	223	181	171	108	112	1
AK	51	100	100	100	100	100	116	116	218	160	239	215	193	171	110	110	1

## Sheet: Kölöntés
Population	Sample	CRmtDNA	SL		LDH		BFRO002		OMM1064		Ssa408uos		SsoSL417		SsoSL438		sdY marker
Kö	1	200	100	100	200	200	124	116	174	174	276	262	190	171	110	112	0
Kö	2	200	100	100	100	200	116	116	228	174	289	255	186	175	112	112	1
Kö	3	100	100	100	100	200	116	116	320	176	255	231	ND	ND	112	112	1
Kö	4	200	100	100	100	100	116	116	240	174	289	227	186	171	112	112	1
Kö	5	200	100	100	100	100	116	116	240	174	289	255	ND	ND	112	112	0
Kö	6	200	100	100	100	200	116	116	267	228	262	227	186	175	112	112	1
Kö	7	200	100	100	100	200	124	116	261	240	289	255	184	181	110	112	0
Kö	8	200	100	100	100	200	124	116	240	174	262	231	193	190	112	112	0
Kö	9	100	100	200	100	100	120	116	255	212	ism		190	177	103	112	1
Kö	10	100	100	100	200	200	120	116	267	174	289	239	ND	ND	112	112	1
Kö	11	200	100	100	100	200	116	116	240	174	227	205	ND	ND	112	112	1
Kö	12	200	100	100	100	200	116	116	240	174	255	205	ND	ND	112	112	1
Kö	13	100	100	100	100	200	116	116	267	261	289	239	181	171	112	112	1
Kö	14	100	100	100	100	100	116	116	261	215	239	239	190	181	112	112	0

## Sheet: Bittva
Population	Sample	CRmtDNA	SL		LDH		BFRO002		OMM1064		Ssa408uos		SsoSL417		SsoSL438		sdY marker
Bittva	1	100	100	100	100	100	116	120	202	212	211	250	184	196	103	112	1
Bittva	2	100	100	100	100	100	116	120	217	212	250	250	184	184	105	112	0
Bittva	3	100	100	100	100	200	116	120	245	245	258	258	171	181	103	103	1
Bittva	4	100	100	100	100	100	116	120	217	247	245	262	181	184	103	106	1
Bittva	5	100	100	100	100	100	116	116	212	245	243	250	171	171	103	106	1
Bittva	6	100	100	100	100	100	116	120	202	245	243	250	177	181	105	112	0
Bittva	7	100	100	100	100	200	120	120	217	245	258	258	171	181	103	103	1
Bittva	8	100	100	100	100	200	120	120	217	230	223	243	177	184	99	105	1
Bittva	9	100	100	100	100	200	116	120	202	245	250	258	184	184	103	103	0

## Sheet: Serbian
Population	Sample	CRmtDNA	SL		LDH		BFRO002		OMM1064		Ssa408uos		SsoSL417		SsoSL438		sdY marker
SRB	1	200	200	200	200	200	120	120	267	278	239	243	181	192	99	99	1
SRB	2	200	200	200	200	200	120	120	274	278	239	309	175	184	99	110	1
SRB	3	200	200	200	200	200	120	120	281	281	239	239	175	177	99	99	1
SRB	4	200	200	200	200	200	120	120	267	281	231	239	181	192	99	110	0
SRB	5	200	200	200	200	200	120	120	281	281	239	247	177	186	99	99	1
SRB	6	200	200	200	200	200	120	120	237	237	237	243	175	177	110	110	0
SRB	7	200	200	200	200	200	120	120	232	269	231	309	175	175	99	99	0
SRB	8	200	200	200	200	200	120	120	206	210	239	239	175	181	99	99	0
SRB	9	200	200	200	200	200	120	120	281	281	239	309	175	177	99	110	0
SRB	10	200	200	200	200	200	120	120	168	237	239	255	175	177	99	110	0
SRB	11	200	200	200	200	200	120	120	267	281	309	309	175	177	99	99	1
SRB	12	200	200	200	200	200	120	120	281	284	239	274	181	184	99	110	1
SRB	13	200	200	200	200	200	120	120	281	281	239	309	175	177	99	99	1
SRB	14	200	200	200	200	200	120	124	232	267	239	309	175	184	99	110	1

[truncated: 1 more sheets: Labels]
